# Supplementary material for: Analysis of clonogenic growth in vitro
Source: Springer Nature journal article supplement (doi:10.1038/s41596-021-00615-0), 2021-10-25
Supplement: MOESM2 [file 41596_2021_615_MOESM2_ESM23.xlsx]

## Sheet: basic information
	ENTER NAME OF EXPERIMENT BELOW
	###
	ENTER ALL TREATMENT CONDITIONS BELOW (only NUMBERS without units; "Control" = untreated = 0)
	Control	Treatment 1	Treatment 2	Treatment 3	Treatment 4	Treatment 5	Treatment 6	Treatment 7	Treatment 8	Treatment 9
	0
	ENTER ALL CELL NUMBERS OF SEEDED CELLS (S-values) FOR EACH INDIVIDUAL TREATMENT BELOW WHICH RESULTED, ON AVERAGE, IN > 0 COLONIES
Cell density #1 (lowest)
Cell density #2
Cell density #3
Cell density #4
Cell density #5
Cell density #6
Cell density #7
Cell density #8
Cell density #9
Cell density #10
Cell density #11
Cell density #12 (highest)
	log(S-values)
Cell density #1 (lowest)
Cell density #2
Cell density #3
Cell density #4
Cell density #5
Cell density #6
Cell density #7
Cell density #8
Cell density #9
Cell density #10
Cell density #11
Cell density #12 (highest)

## Sheet: data input
ENTER NUMBERS OF COUNTED COLONIES (C) FOR EACH INDIVIDUAL DOSE BELOW (up to 8 biological replicates)
Seeded cells (S)	Replicate 1	Replicate 2	Replicate 3	Replicate 4	Replicate 5	Replicate 6	Replicate 7	Replicate 8							Fitting procedure according to C = a × Sb -> log(C) = log(a) + b * log(S)
Control	0									C: mean over replicates	log(C)	log(S)			0
														log(a)
														s_log(a)
														b
														s_b
														r(log(a),b)
Seeded cells (S)	Replicate 1	Replicate 2	Replicate 3	Replicate 4	Replicate 5	Replicate 6	Replicate 7	Replicate 8							Surviving fractions for 20 colonies (C)
Treatment 1										C: mean over replicates	log(C)	log(S)			0
														SF
														standard error SF
														log10(SF)
														standard error log10(SF)
Seeded cells (S)	Replicate 1	Replicate 2	Replicate 3	Replicate 4	Replicate 5	Replicate 6	Replicate 7	Replicate 8
Treatment 2										C: mean over replicates	log(C)	log(S)
Seeded cells (S)	Replicate 1	Replicate 2	Replicate 3	Replicate 4	Replicate 5	Replicate 6	Replicate 7	Replicate 8
Treatment 3										C: mean over replicates	log(C)	log(S)
Seeded cells (S)	Replicate 1	Replicate 2	Replicate 3	Replicate 4	Replicate 5	Replicate 6	Replicate 7	Replicate 8
Treatment 4										C: mean over replicates	log(C)	log(S)
Seeded cells (S)	Replicate 1	Replicate 2	Replicate 3	Replicate 4	Replicate 5	Replicate 6	Replicate 7	Replicate 8
Treatment 5										C: mean over replicates	log(C)	log(S)
Seeded cells (S)	Replicate 1	Replicate 2	Replicate 3	Replicate 4	Replicate 5	Replicate 6	Replicate 7	Replicate 8
Treatment 6										C: mean over replicates	log(C)	log(S)
Seeded cells (S)	Replicate 1	Replicate 2	Replicate 3	Replicate 4	Replicate 5	Replicate 6	Replicate 7	Replicate 8
Treatment 7										C: mean over replicates	log(C)	log(S)
Seeded cells (S)	Replicate 1	Replicate 2	Replicate 3	Replicate 4	Replicate 5	Replicate 6	Replicate 7	Replicate 8
Treatment 8										C: mean over replicates	log(C)	log(S)
Seeded cells (S)	Replicate 1	Replicate 2	Replicate 3	Replicate 4	Replicate 5	Replicate 6	Replicate 7	Replicate 8
Treatment 9										C: mean over replicates	log(C)	log(S)

## Sheet: results
	###
	Control	Treatment 1	Treatment 2	Treatment 3	Treatment 4	Treatment 5	Treatment 6	Treatment 7	Treatment 8	Treatment 9
	0
Surviving fraction SF for C=20 [%]	100
uncertainty sd(SF) [%]	0
upper bound (95%) [%]
lower bound (95%) [%]
log10(SF)	0
uncertainty sd(log10(SF)	0
upper bound (95%)
lower bound (95%)
b-value of fit
R-squared (log(S) vs. log(C))

## Sheet: calculation
	C: mean over replicates	log(C)	log(S)	C	data
				20	0	n	d = log(C)	m(log(S))	sd(log(S))	mean(log(C))	sd(log(C))	r(log(S),log(C))		log(a)	sd(log(a))	b	sd(b)	Cov(log(a),b)		res	res.quad	s.quad	log(S).quad	vx		S(C)
	Control
					0	n	d = log(C)	m(log(S))	sd(log(S))	mean(log(C))	sd(log(C))	r(log(S),log(C))		log(a)	sd(log(a))	b	sd(b)	Cov(log(a),b)		res	res.quad	s.quad	log(S).quad	vx		S(C)		SF	Var(SF)	SD(SF)	log(SF)	Var(log(SF))	SD(log(SF))
	Treatment 1
					0	n	d = log(C)	m(log(S))	sd(log(S))	mean(log(C))	sd(log(C))	r(log(S),log(C))		log(a)	sd(log(a))	b	sd(b)	Cov(log(a),b)		res	res.quad	s.quad	log(S).quad	vx		S(C)		SF	Var(SF)	SD(SF)	log(SF)	Var(log(SF))	SD(log(SF))
	Treatment 2
					0	n	d = log(C)	m(log(S))	sd(log(S))	mean(log(C))	sd(log(C))	r(log(S),log(C))		log(a)	sd(log(a))	b	sd(b)	Cov(log(a),b)		res	res.quad	s.quad	log(S).quad	vx		S(C)		SF	Var(SF)	SD(SF)	log(SF)	Var(log(SF))	SD(log(SF))
	Treatment 3
					0	n	d = log(C)	m(log(S))	sd(log(S))	mean(log(C))	sd(log(C))	r(log(S),log(C))		log(a)	sd(log(a))	b	sd(b)	Cov(log(a),b)		res	res.quad	s.quad	log(S).quad	vx		S(C)		SF	Var(SF)	SD(SF)	log(SF)	Var(log(SF))	SD(log(SF))
	Treatment 4
					0	n	d = log(C)	m(log(S))	sd(log(S))	mean(log(C))	sd(log(C))	r(log(S),log(C))		log(a)	sd(log(a))	b	sd(b)	Cov(log(a),b)		res	res.quad	s.quad	log(S).quad	vx		S(C)		SF	Var(SF)	SD(SF)	log(SF)	Var(log(SF))	SD(log(SF))
	Treatment 5
					0	n	d = log(C)	m(log(S))	sd(log(S))	mean(log(C))	sd(log(C))	r(log(S),log(C))		log(a)	sd(log(a))	b	sd(b)	Cov(log(a),b)		res	res.quad	s.quad	log(S).quad	vx		S(C)		SF	Var(SF)	SD(SF)	log(SF)	Var(log(SF))	SD(log(SF))
	Treatment 6
					0	n	d = log(C)	m(log(S))	sd(log(S))	mean(log(C))	sd(log(C))	r(log(S),log(C))		log(a)	sd(log(a))	b	sd(b)	Cov(log(a),b)		res	res.quad	s.quad	log(S).quad	vx		S(C)		SF	Var(SF)	SD(SF)	log(SF)	Var(log(SF))	SD(log(SF))
	Treatment 7
					0	n	d = log(C)	m(log(S))	sd(log(S))	mean(log(C))	sd(log(C))	r(log(S),log(C))		log(a)	sd(log(a))	b	sd(b)	Cov(log(a),b)		res	res.quad	s.quad	log(S).quad	vx		S(C)		SF	Var(SF)	SD(SF)	log(SF)	Var(log(SF))	SD(log(SF))
	Treatment 8
					0	n	d = log(C)	m(log(S))	sd(log(S))	mean(log(C))	sd(log(C))	r(log(S),log(C))		log(a)	sd(log(a))	b	sd(b)	Cov(log(a),b)		res	res.quad	s.quad	log(S).quad	vx		S(C)		SF	Var(SF)	SD(SF)	log(SF)	Var(log(SF))	SD(log(SF))
	Treatment 9
