# Supplementary material for: Analysis of clonogenic growth in vitro
Source: Springer Nature journal article supplement (doi:10.1038/s41596-021-00615-0), 2021-10-25
Supplement: MOESM3 [file 41596_2021_615_MOESM3_ESM24.xlsx]

## Sheet: basic information
	ENTER NAME OF EXPERIMENT BELOW
	###
	ENTER ALL TREATMENT CONDITIONS BELOW (only NUMBERS without units; "Control" = untreated = 0)
	Control	Treatment 1	Treatment 2	Treatment 3	Treatment 4	Treatment 5	Treatment 6	Treatment 7	Treatment 8	Treatment 9
	0
	ENTER ALL CELL NUMBERS OF SEEDED CELLS (S-values) FOR EACH INDIVIDUAL TREATMENT BELOW WHICH RESULTED, ON AVERAGE, IN > 0 COLONIES
Cell density #1 (lowest)
Cell density #2
Cell density #3
Cell density #4
Cell density #5
Cell density #6
Cell density #7
Cell density #8
Cell density #9
Cell density #10
Cell density #11
Cell density #12 (highest)
	log(S-values)
Cell density #1 (lowest)
Cell density #2
Cell density #3
Cell density #4
Cell density #5
Cell density #6
Cell density #7
Cell density #8
Cell density #9
Cell density #10
Cell density #11
Cell density #12 (highest)

## Sheet: data input
ENTER NUMBERS OF COUNTED COLONIES (C) FOR EACH INDIVIDUAL DOSE BELOW (up to 8 biological replicates)
Seeded cells (S)	Replicate 1	Replicate 2	Replicate 3	Replicate 4	Replicate 5	Replicate 6	Replicate 7	Replicate 8
Control	0											Replicate 1	Replicate 2	Replicate 3	Replicate 4	Replicate 5	Replicate 6	Replicate 7	Replicate 8
											SF_repl
											sd(SF_repl)
											log10(SF)_repl
											sd(log10(SF_repl))
											SF_control
											uncertainty
											log10(SF_control)
											uncertainty
Seeded cells (S)	Replicate 1	Replicate 2	Replicate 3	Replicate 4	Replicate 5	Replicate 6	Replicate 7	Replicate 8
Treatment 1												Replicate 1	Replicate 2	Replicate 3	Replicate 4	Replicate 5	Replicate 6	Replicate 7	Replicate 8
											SF_repl
											sd(SF_repl)
											log10(SF)_repl
											sd(log10(SF_repl))
											mean(SF_treat)
											uncertainty [sem]
											mean(log10(SF_treatment))
											uncertainty [sem]
Seeded cells (S)	Replicate 1	Replicate 2	Replicate 3	Replicate 4	Replicate 5	Replicate 6	Replicate 7	Replicate 8
Treatment 2												Replicate 1	Replicate 2	Replicate 3	Replicate 4	Replicate 5	Replicate 6	Replicate 7	Replicate 8
											SF_repl
											sd(SF_repl)
											log10(SF)_repl
											sd(log10(SF_repl))
											mean(SF_treat)
											uncertainty [sem]
											mean(log10(SF_treatment))
											uncertainty [sem]
Seeded cells (S)	Replicate 1	Replicate 2	Replicate 3	Replicate 4	Replicate 5	Replicate 6	Replicate 7	Replicate 8
Treatment 3												Replicate 1	Replicate 2	Replicate 3	Replicate 4	Replicate 5	Replicate 6	Replicate 7	Replicate 8
											SF_repl
											sd(SF_repl)
											log10(SF)_repl
											sd(log10(SF_repl))
											mean(SF_treat)
											uncertainty [sem]
											mean(log10(SF_treatment))
											uncertainty [sem]
Seeded cells (S)	Replicate 1	Replicate 2	Replicate 3	Replicate 4	Replicate 5	Replicate 6	Replicate 7	Replicate 8
Treatment 4												Replicate 1	Replicate 2	Replicate 3	Replicate 4	Replicate 5	Replicate 6	Replicate 7	Replicate 8
											SF_repl
											sd(SF_repl)
											log10(SF)_repl
											sd(log10(SF_repl))
											mean(SF_treat)
											uncertainty [sem]
											mean(log10(SF_treatment))
											uncertainty [sem]
Seeded cells (S)	Replicate 1	Replicate 2	Replicate 3	Replicate 4	Replicate 5	Replicate 6	Replicate 7	Replicate 8
Treatment 5												Replicate 1	Replicate 2	Replicate 3	Replicate 4	Replicate 5	Replicate 6	Replicate 7	Replicate 8
											SF_repl
											sd(SF_repl)
											log10(SF)_repl
											sd(log10(SF_repl))
											mean(SF_treat)
											uncertainty [sem]
											mean(log10(SF_treatment))
											uncertainty [sem]
Seeded cells (S)	Replicate 1	Replicate 2	Replicate 3	Replicate 4	Replicate 5	Replicate 6	Replicate 7	Replicate 8
Treatment 6												Replicate 1	Replicate 2	Replicate 3	Replicate 4	Replicate 5	Replicate 6	Replicate 7	Replicate 8
											SF_repl
											sd(SF_repl)
											log10(SF)_repl
											sd(log10(SF_repl))
											mean(SF_treat)
											uncertainty [sem]
											mean(log10(SF_treatment))
											uncertainty [sem]
Seeded cells (S)	Replicate 1	Replicate 2	Replicate 3	Replicate 4	Replicate 5	Replicate 6	Replicate 7	Replicate 8
Treatment 7												Replicate 1	Replicate 2	Replicate 3	Replicate 4	Replicate 5	Replicate 6	Replicate 7	Replicate 8
											SF_repl
											sd(SF_repl)
											log10(SF)_repl
											sd(log10(SF_repl))
											mean(SF_treat)
											uncertainty [sem]
											mean(log10(SF_treatment))
											uncertainty [sem]
Seeded cells (S)	Replicate 1	Replicate 2	Replicate 3	Replicate 4	Replicate 5	Replicate 6	Replicate 7	Replicate 8
Treatment 8												Replicate 1	Replicate 2	Replicate 3	Replicate 4	Replicate 5	Replicate 6	Replicate 7	Replicate 8
											SF_repl
											sd(SF_repl)
											log10(SF)_repl
											sd(log10(SF_repl))
											mean(SF_treat)
											uncertainty [sem]
											mean(log10(SF_treatment))
											uncertainty [sem]
Seeded cells (S)	Replicate 1	Replicate 2	Replicate 3	Replicate 4	Replicate 5	Replicate 6	Replicate 7	Replicate 8
Treatment 9												Replicate 1	Replicate 2	Replicate 3	Replicate 4	Replicate 5	Replicate 6	Replicate 7	Replicate 8
											SF_repl
											sd(SF_repl)
											log10(SF)_repl
											sd(log10(SF_repl))
											mean(SF_treat)
											uncertainty [sem]
											mean(log10(SF_treatment))
											uncertainty [sem]

## Sheet: results
	###
	Control	Treatment 1	Treatment 2	Treatment 3	Treatment 4	Treatment 5	Treatment 6	Treatment 7	Treatment 8	Treatment 9
	0
Surviving fraction SF [%]	100
uncertainty sd(SF) [%]	0
upper bound (95%) [%]
lower bound (95%) [%]
log10(SF)	0
uncertainty sd(log10(SF))	0
upper bound (95%)
lower bound (95%)

## Sheet: calculation
	Replicate 1	Replicate 2	Replicate 3	Replicate 4	Replicate 5	Replicate 6	Replicate 7	Replicate 8
	0									data
										mean_PE
										sd_PE
										n
										sem_PE
	Replicate 1	Replicate 2	Replicate 3	Replicate 4	Replicate 5	Replicate 6	Replicate 7	Replicate 8
										data
										SF
										sd(SF)
										Var(SF)
										log10(SF)
										sd(log10(SF))
										Var(log10(SF))
										mean_PE
										sd_PE
										n
										sem_PE
	Replicate 1	Replicate 2	Replicate 3	Replicate 4	Replicate 5	Replicate 6	Replicate 7	Replicate 8
										data
										SF
										sd(SF)
										Var(SF)
										log10(SF)
										sd(log10(SF))
										Var(log10(SF))
										mean_PE
										sd_PE
										n
										sem_PE
	Replicate 1	Replicate 2	Replicate 3	Replicate 4	Replicate 5	Replicate 6	Replicate 7	Replicate 8
										data
										SF
										sd(SF)
										Var(SF)
										log10(SF)
										sd(log10(SF))
										Var(log10(SF))
										mean_PE
										sd_PE
										n
										sem_PE
	Replicate 1	Replicate 2	Replicate 3	Replicate 4	Replicate 5	Replicate 6	Replicate 7	Replicate 8
										data
										SF
										sd(SF)
										Var(SF)
										log10(SF)
										sd(log10(SF))
										Var(log10(SF))
										mean_PE
										sd_PE
										n
										sem_PE
	Replicate 1	Replicate 2	Replicate 3	Replicate 4	Replicate 5	Replicate 6	Replicate 7	Replicate 8
										data
										SF
										sd(SF)
										Var(SF)
										log10(SF)
										sd(log10(SF))
										Var(log10(SF))
										mean_PE
										sd_PE
										n
										sem_PE
	Replicate 1	Replicate 2	Replicate 3	Replicate 4	Replicate 5	Replicate 6	Replicate 7	Replicate 8
										data
										SF
										sd(SF)
										Var(SF)
										log10(SF)
										sd(log10(SF))
										Var(log10(SF))
										mean_PE
										sd_PE
										n
										sem_PE
	Replicate 1	Replicate 2	Replicate 3	Replicate 4	Replicate 5	Replicate 6	Replicate 7	Replicate 8
										data
										SF
										sd(SF)
										Var(SF)
										log10(SF)
										sd(log10(SF))
										Var(log10(SF))
										mean_PE
										sd_PE
										n
										sem_PE
	Replicate 1	Replicate 2	Replicate 3	Replicate 4	Replicate 5	Replicate 6	Replicate 7	Replicate 8
										data
										SF
										sd(SF)
										Var(SF)
										log10(SF)
										sd(log10(SF))
										Var(log10(SF))
										mean_PE
										sd_PE
										n
										sem_PE
	Replicate 1	Replicate 2	Replicate 3	Replicate 4	Replicate 5	Replicate 6	Replicate 7	Replicate 8
										data
										SF
										sd(SF)
										Var(SF)
										log10(SF)
										sd(log10(SF))
										Var(log10(SF))
										mean_PE
										sd_PE
										n
										sem_PE
